# Supplementary material for: Systematic sequencing of mRNA from the Antarctic krill (Euphausia superba) and first tissue specific transcriptional signature
Source: Springer Nature journal article supplement (doi:10.1186/1471-2164-9-45), 2008-01-28
Supplement: Additional file 2 [file 1471-2164-9-45-s2.pdf]

## Additional File 2

### Forward and reverse primers used for qRT-PCR

| # | Consensus | Description                                    | Forward Primer (5'-3') | Reverse Primer (5'-3') |
|---|-----------|------------------------------------------------|------------------------|------------------------|
|   | KRC00735  | Compound eye opsin BCRH1                       | TGACAGTCCACATGCCATGGT  | TCTGCGAAGGCTCCTATGCC   |
|   | KRC00032  | Myosin light chain                             | GTATCATCGGCATGCTCTGCG  | ACTGGAACCCTCATTGCCCG   |
|   | KRC00155  | Myosin heavy chain                             | TGAGGCTGAACTGGCCAAACT  | GACATCTCGCCAACAGCATCA  |
|   | KRC00566  | Arthrodial cuticle protein AMP16.3             | CAGTCTCCATTGGTCCCCGT   | ACCCCCTGTGCAGCGAATT    |
|   | KRC00319  | Tail muscle elongation factor 1 gamma          | GGTGTCTTCGGTGAGGATGGT  | GGTGCGTCAGCATCAAGCTT   |
|   | KRC00338  | Cellular retinoic acid/retinol binding protein | CGCATACTGCCAGTACTTCC   | CATCGAAGCCCTCAGAGCTG   |
|   | KRC00786  | Eukaryotic initiation factor 4A                | TCCAACAGGTTTCCCTTGTC   | TGGCAACACCTTTCCTACCAA  |
|   | KRC00208  | Transport protein SEC61 subunit gamma          | TGCACCAAGCCAGACAGAAAG  | TCCTAGGCCCCCAACAATGA   |
|   | KRC00402  | Chromodomain helicase DNA binding protein      | CCGCTGCCTCCATTATTAGCC  | TGCTTCTTGAGGTGGCATTCC  |
|   | KRC00160  | Voltage-dependent calcium channel              | GCGGATGTTGGTTTCATCCC   | CCAGGTCAAGCCCAGAGGAA   |

### Relative Expression values (RQ)

| # Consensus | Description                                    | Tissues     | RQ       | RQ min   | RQ max   |
|-------------|------------------------------------------------|-------------|----------|----------|----------|
| KRC00735    | Compound eye opsin BCRH1                       | Head        | 17297.06 | 15866.30 | 18856.85 |
|             |                                                | Abdomen     | 1.00     | 0.36     | 2.76     |
|             |                                                | Photophores | 86.42    | 66.51    | 112.27   |
|             |                                                | Thoracopods | 3.06     | 1.93     | 4.86     |
| KRC00032    | Myosin light chain                             | Head        | 0.12     | 0.11     | 0.15     |
|             |                                                | Abdomen     | 1.00     | 0.89     | 1.13     |
|             |                                                | Photophores | 0.17     | 0.15     | 0.20     |
|             |                                                | Thoracopods | 0.15     | 0.13     | 0.16     |
| KRC00155    | Myosin heavy chain                             | Head        | 0.43     | 0.39     | 0.46     |
|             |                                                | Abdomen     | 1.00     | 0.88     | 1.13     |
|             |                                                | Photophores | 0.40     | 0.35     | 0.46     |
|             |                                                | Thoracopods | 2.30     | 1.76     | 3.01     |
| KRC00566    | Arthroial cuticle protein AMP16.3              | Head        | 3500.00  | 3166.70  | 3868.38  |
|             |                                                | Abdomen     | 1.00     | 0.86     | 1.16     |
|             |                                                | Photophores | 3.03     | 1.78     | 5.15     |
|             |                                                | Thoracopods | 1.85     | 1.22     | 2.79     |
| KRC00319    | Tail muscle elongation factor 1 gamma          | Head        | 2.16     | 1.86     | 2.51     |
|             |                                                | Abdomen     | 1.00     | 0.81     | 1.23     |
|             |                                                | Photophores | 2.29     | 2.03     | 2.60     |
|             |                                                | Thoracopods | 0.87     | 0.77     | 0.99     |
| KRC00338    | Cellular retinoic acid/retinol binding protein | Head        | 0.90     | 0.83     | 0.96     |
|             |                                                | Abdomen     | 1.00     | 0.91     | 1.09     |
|             |                                                | Photophores | 6.04     | 5.06     | 7.21     |
|             |                                                | Thoracopods | 2.02     | 1.56     | 2.37     |
| KRC00786    | Eukaryotic initiation factor 4A                | Head        | 1.40     | 1.23     | 1.61     |
|             |                                                | Abdomen     | 1.00     | 0.87     | 1.15     |
|             |                                                | Photophores | 2.08     | 1.79     | 2.40     |
|             |                                                | Thoracopods | 1.65     | 1.35     | 2.03     |
| KRC00208    | Transport protein SEC61 subunit gamma          | Head        | 6.06     | 4.73     | 7.77     |
|             |                                                | Abdomen     | 1.00     | 0.72     | 1.39     |
|             |                                                | Photophores | 0.07     | 0.04     | 0.10     |
|             |                                                | Thoracopods | 0.84     | 0.75     | 0.94     |
| KRC00402    | Chromodomain helicase DNA binding protein      | Head        | 2.58     | 2.23     | 2.99     |
|             |                                                | Abdomen     | 1.00     | 0.71     | 1.42     |
|             |                                                | Photophores | 3.28     | 2.84     | 3.77     |
|             |                                                | Thoracopods | 2.89     | 2.38     | 3.50     |
| KRC00160    | Voltage-dependent calcium channel              | Head        | 0.29     | 0.23     | 0.38     |
|             |                                                | Abdomen     | 1.00     | 0.57     | 1.35     |
|             |                                                | Photophores | 0.21     | 0.18     | 0.25     |
|             |                                                | Thoracopods | 0.18     | 0.14     | 0.23     |

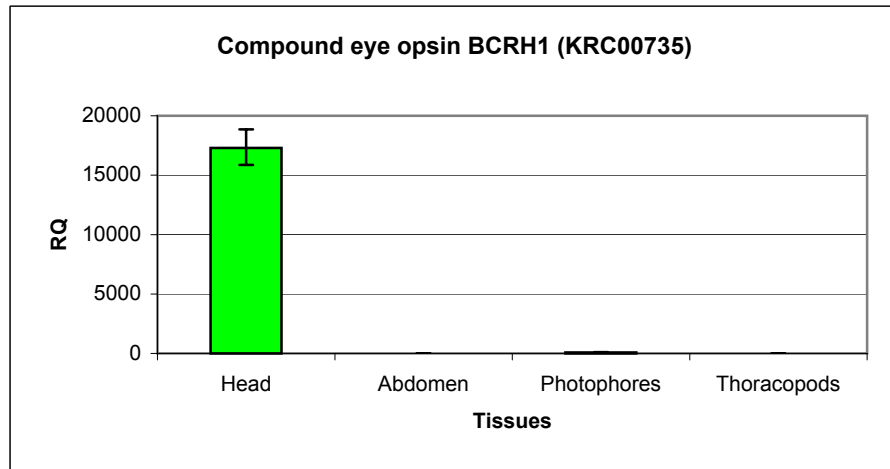

|                 | Head | Abdomen | Photophores | Thoracopods |
|-----------------|------|---------|-------------|-------------|
| <b>KRC00735</b> | 1    | 0       | 0           | 0           |

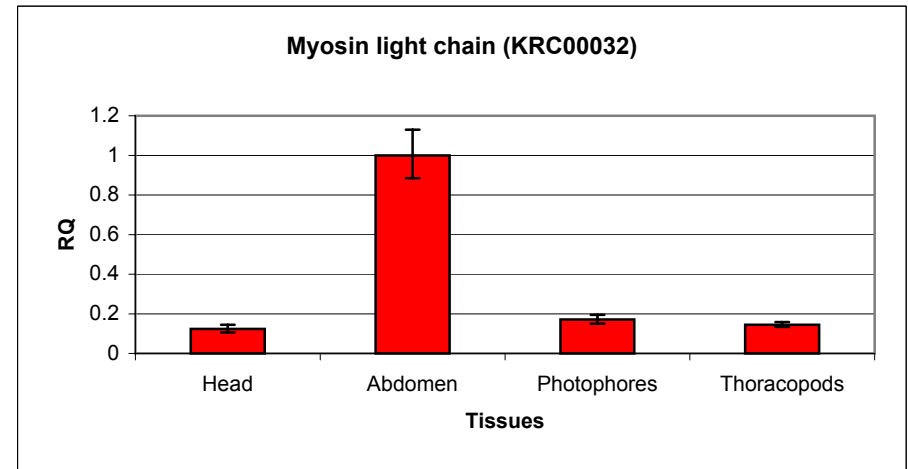

|                 | Head | Abdomen | Photophores | Thoracopods |
|-----------------|------|---------|-------------|-------------|
| <b>KRC00032</b> | 0    | 8       | 0           | 0           |

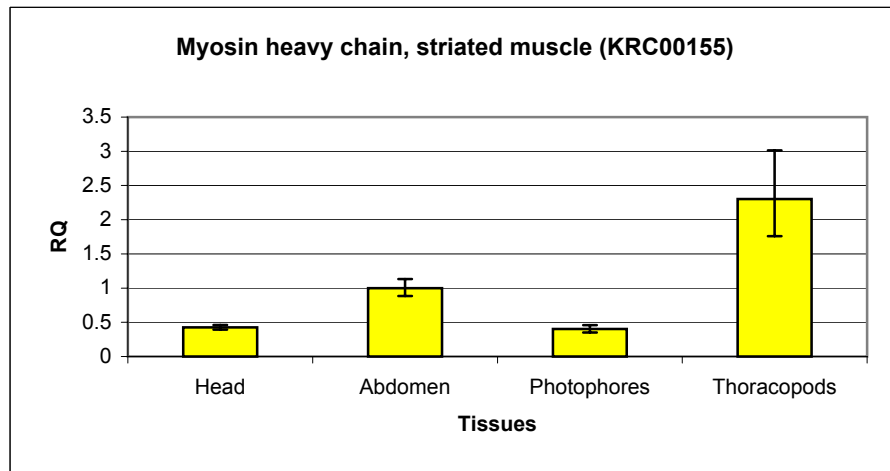

|                 | Head | Abdomen | Photophores | Thoracopods |
|-----------------|------|---------|-------------|-------------|
| <b>KRC00155</b> | 0    | 3       | 0           | 2           |

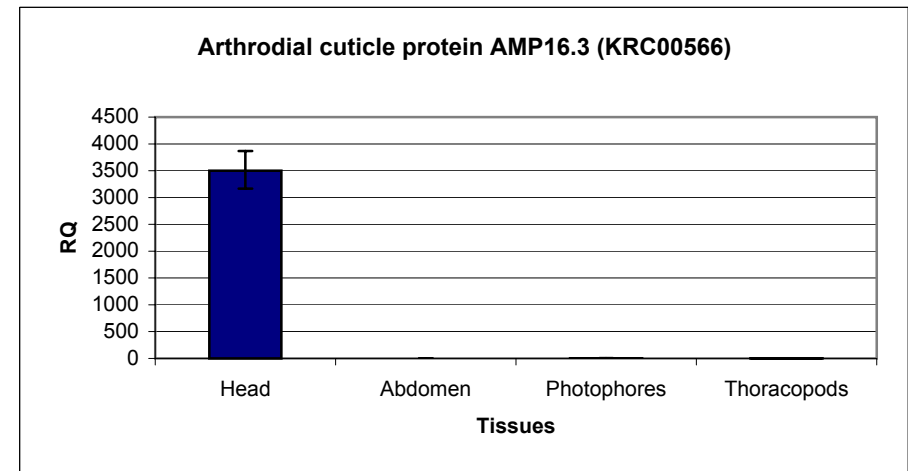

|                 | Head | Abdomen | Photophores | Thoracopods |
|-----------------|------|---------|-------------|-------------|
| <b>KRC00566</b> | 5    | 0       | 0           | 0           |

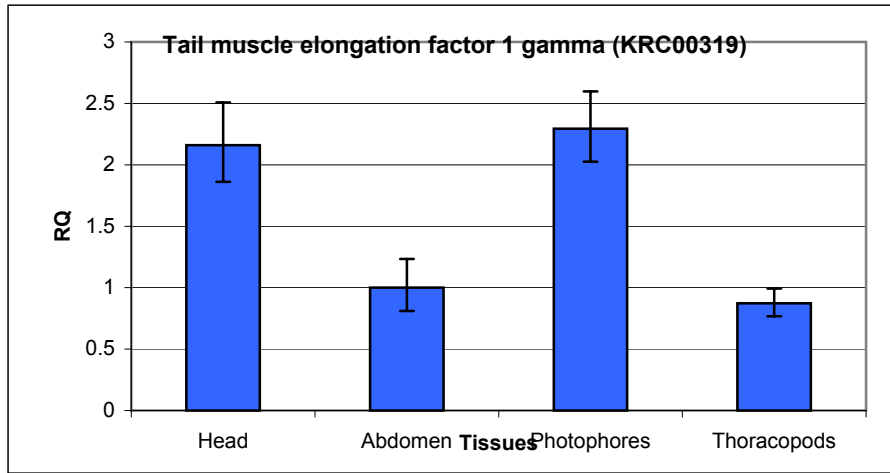

|                 | Head | Abdomen | Photophores | Thoracopods |
|-----------------|------|---------|-------------|-------------|
| <b>KRC00319</b> | 0    | 0       | 2           | 0           |

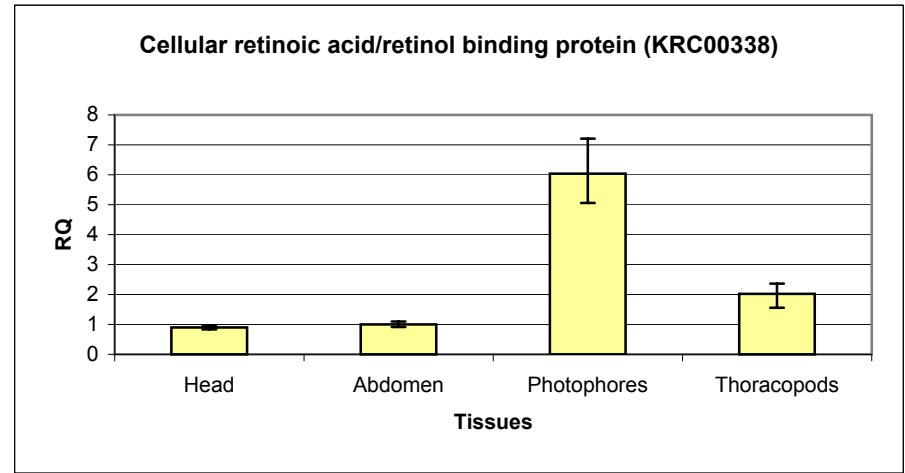

|                 | Head | Abdomen | Photophores | Thoracopods |
|-----------------|------|---------|-------------|-------------|
| <b>KRC00338</b> | 0    | 0       | 1           | 0           |

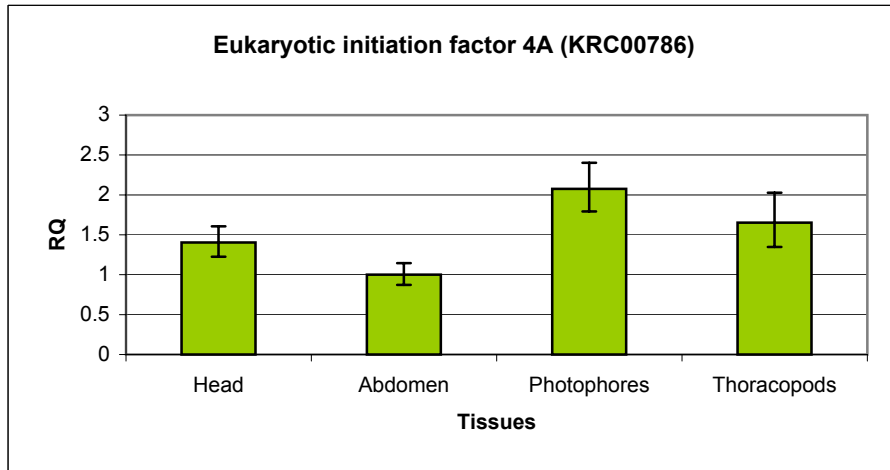

|                 | Head | Abdomen | Photophores | Thoracopods |
|-----------------|------|---------|-------------|-------------|
| <b>KRC00786</b> | 1    | 0       | 0           | 1           |

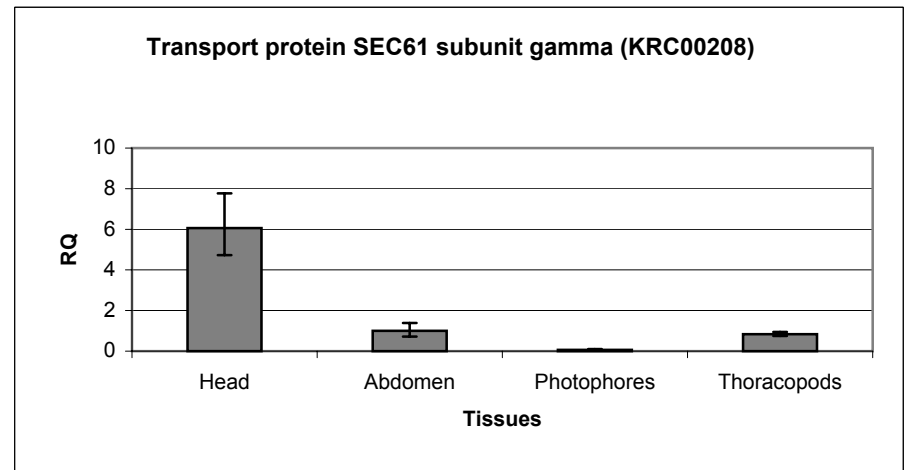

|                 | Head | Abdomen | Photophores | Thoracopods |
|-----------------|------|---------|-------------|-------------|
| <b>KRC00208</b> | 1    | 0       | 0           | 1           |

**Chromodomain helicase DNA binding protein (KRC00402)**

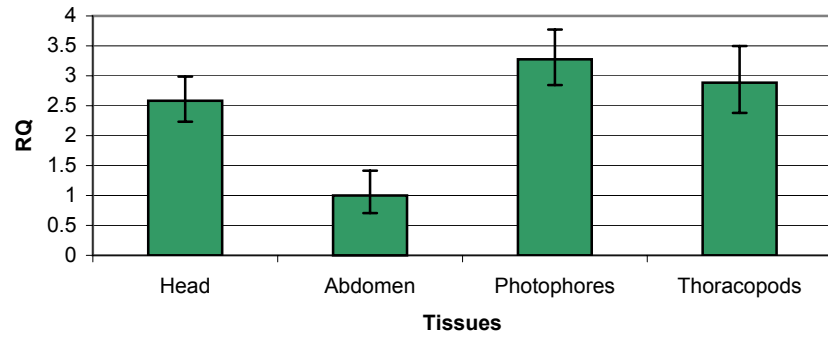

|          | Head | Abdomen | Photophores | Thoracopods |
|----------|------|---------|-------------|-------------|
| KRC00402 | 0    | 0       | 1           | 0           |

**Voltage-dependent calcium channel (KRC00160)**

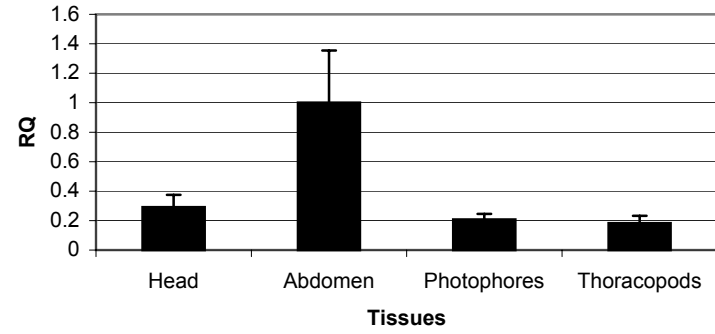

|          | Head | Abdomen | Photophores | Thoracopods |
|----------|------|---------|-------------|-------------|
| KRC00160 | 0    | 1       | 0           | 0           |
